# Supplementary material for: Spatial Structure of NanoFAST in the Apo State and in Complex with its Fluorogen HBR-DOM2
Source: MDPI journal article supplement (doi:10.3390/ijms231911361), 2022-09-26
Supplement: s1 [file s1]

# Spatial structure of nanoFAST in the apo state and in complex with its fluorogen HBR-DOM2

Vladislav A. Lushpa, Nadezhda S. Baleeva, Sergey A. Goncharuk, Marina V. Goncharuk, Alexander S. Arseniev, Mikhail S. Baranov and Konstantin S. Mineev

## Supplementary Materials

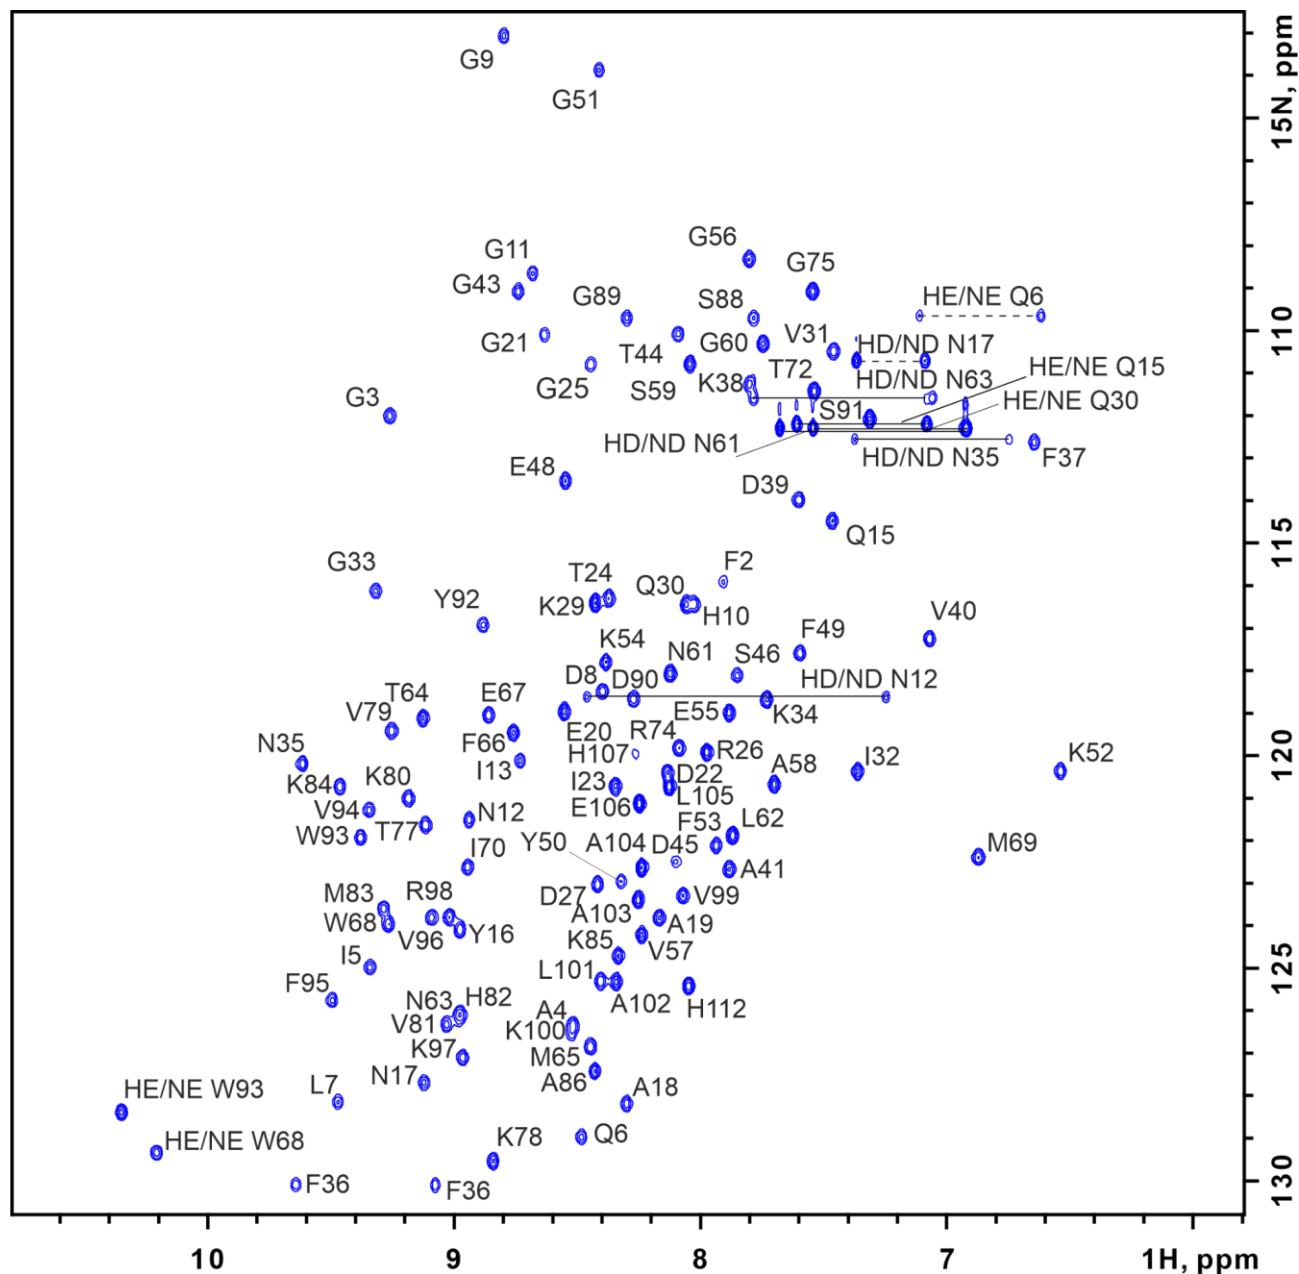

**Figure S1.**  $^{15}\text{N}$ -HSQC spectrum of nanoFAST apo state. Spectrum was obtained at 25 °C, pH 7.0. Assignment of NH groups is indicated.

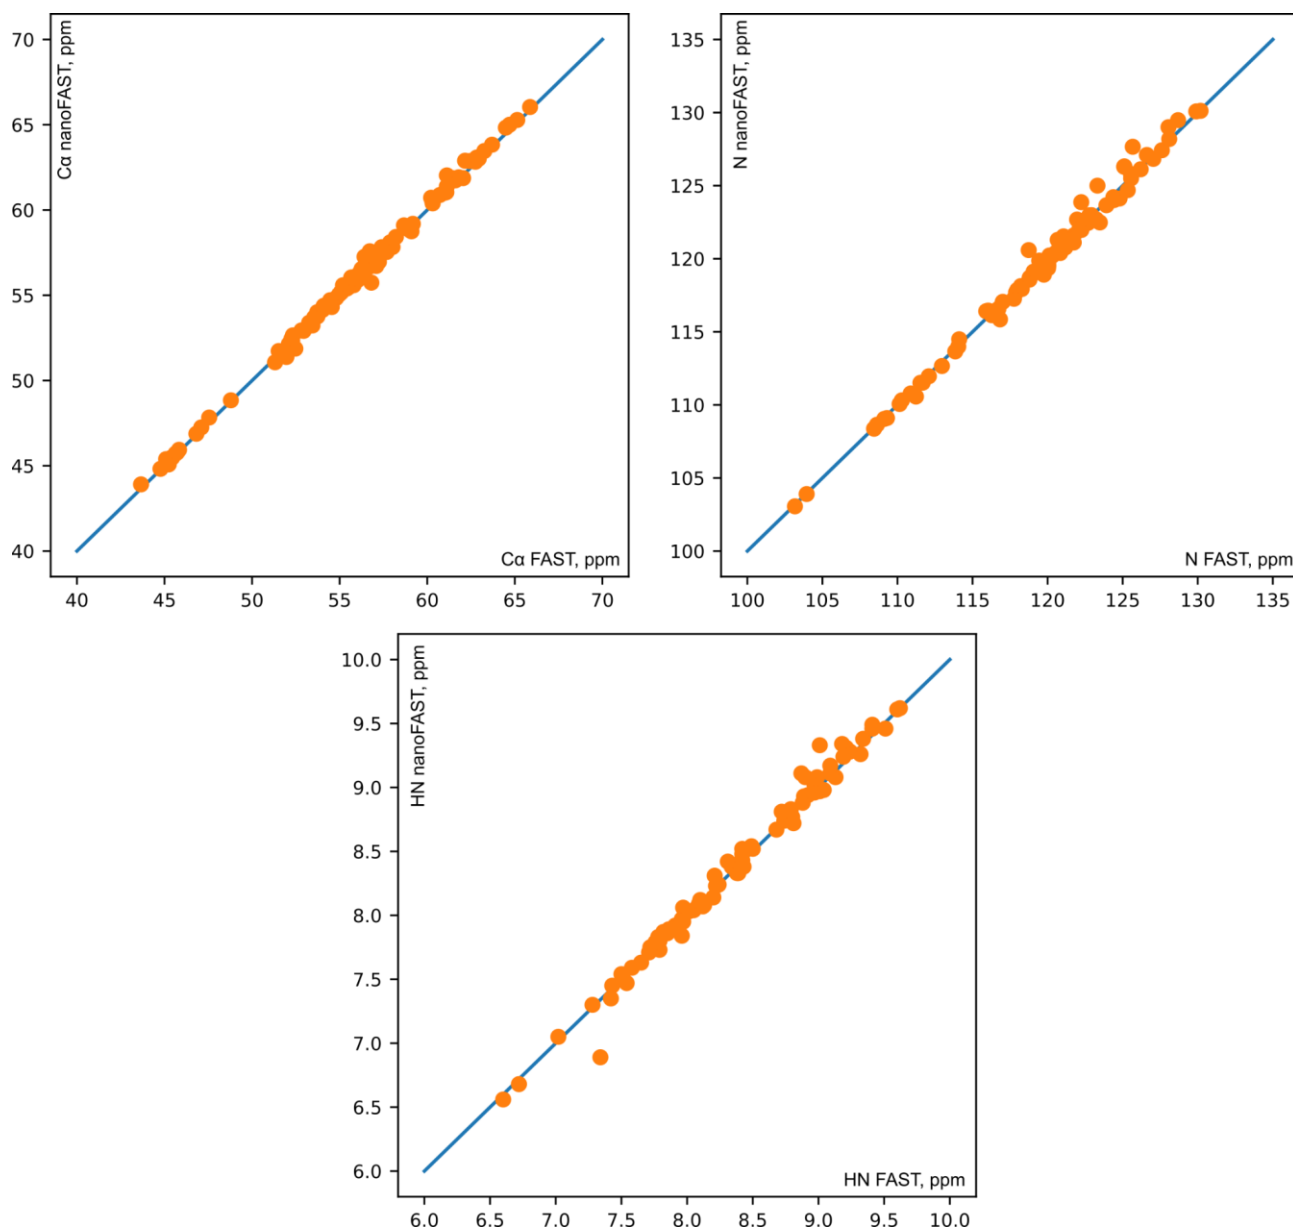

**Figure S2.** Chemical shift correlations between FAST and nanoFAST apo states. Shown are the correlation plots between the  $^{13}\text{C}\alpha$ ,  $^{15}\text{N}$  and  $^{15}\text{H}_\text{N}$  chemical shifts of nanoFAST and corresponding residues of FAST C-terminal domain. Blue lines show the  $y=x$  dependence.

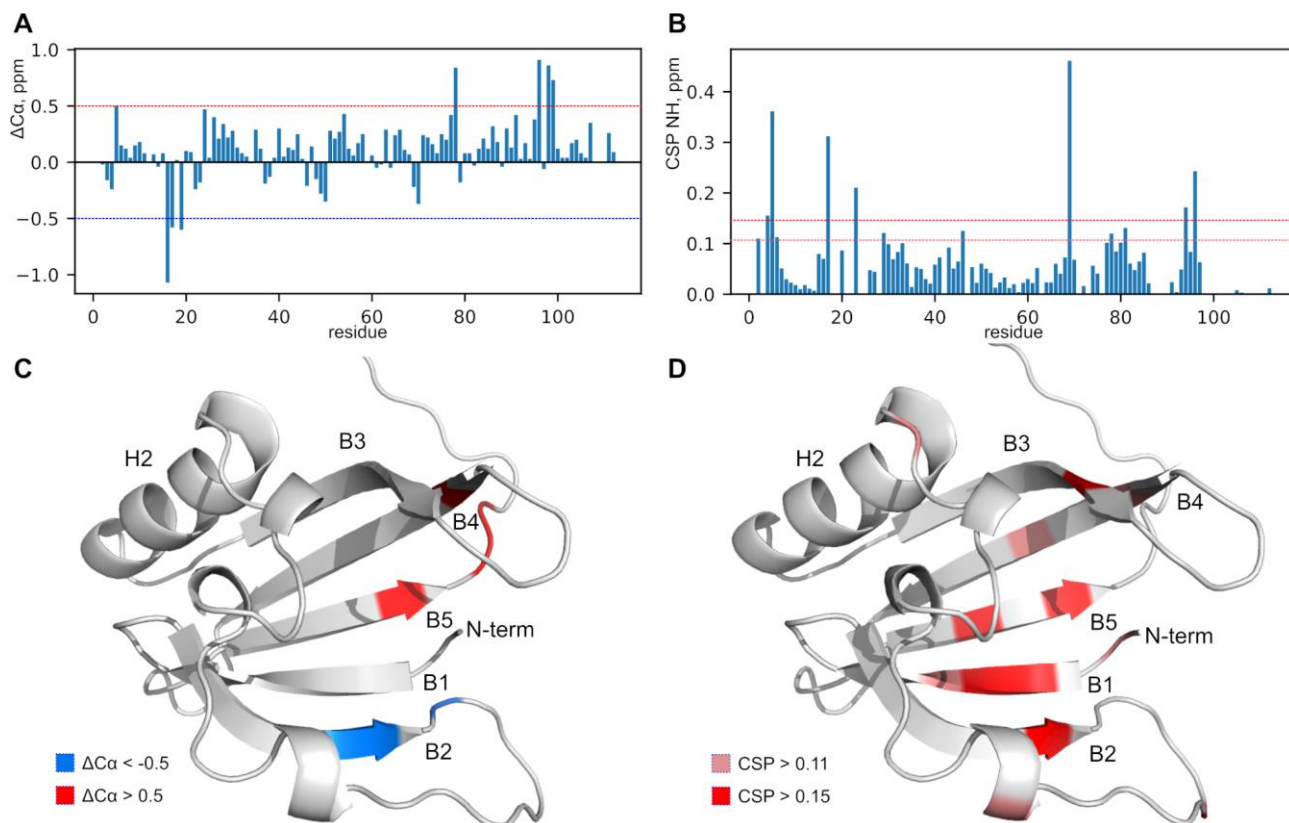

**Figure S3.** Chemical shifts differences between FAST and nanoFAST apo states. **A** -  $^{13}\text{C}\alpha$  chemical shift differences, observed between the residues of nanoFAST and of FAST C-terminal domain in their apo states (nanoFAST-FAST). **B** - Chemical shift perturbations (CSPs) of nanoFAST amide groups, observed due to the absence of the N-terminal domain in the protein. **C,D** - spatial structures of nanoFAST are colored, according to the position of outlying residues on the plots **A** and **B**, respectively. Color codes are provided in the legends.

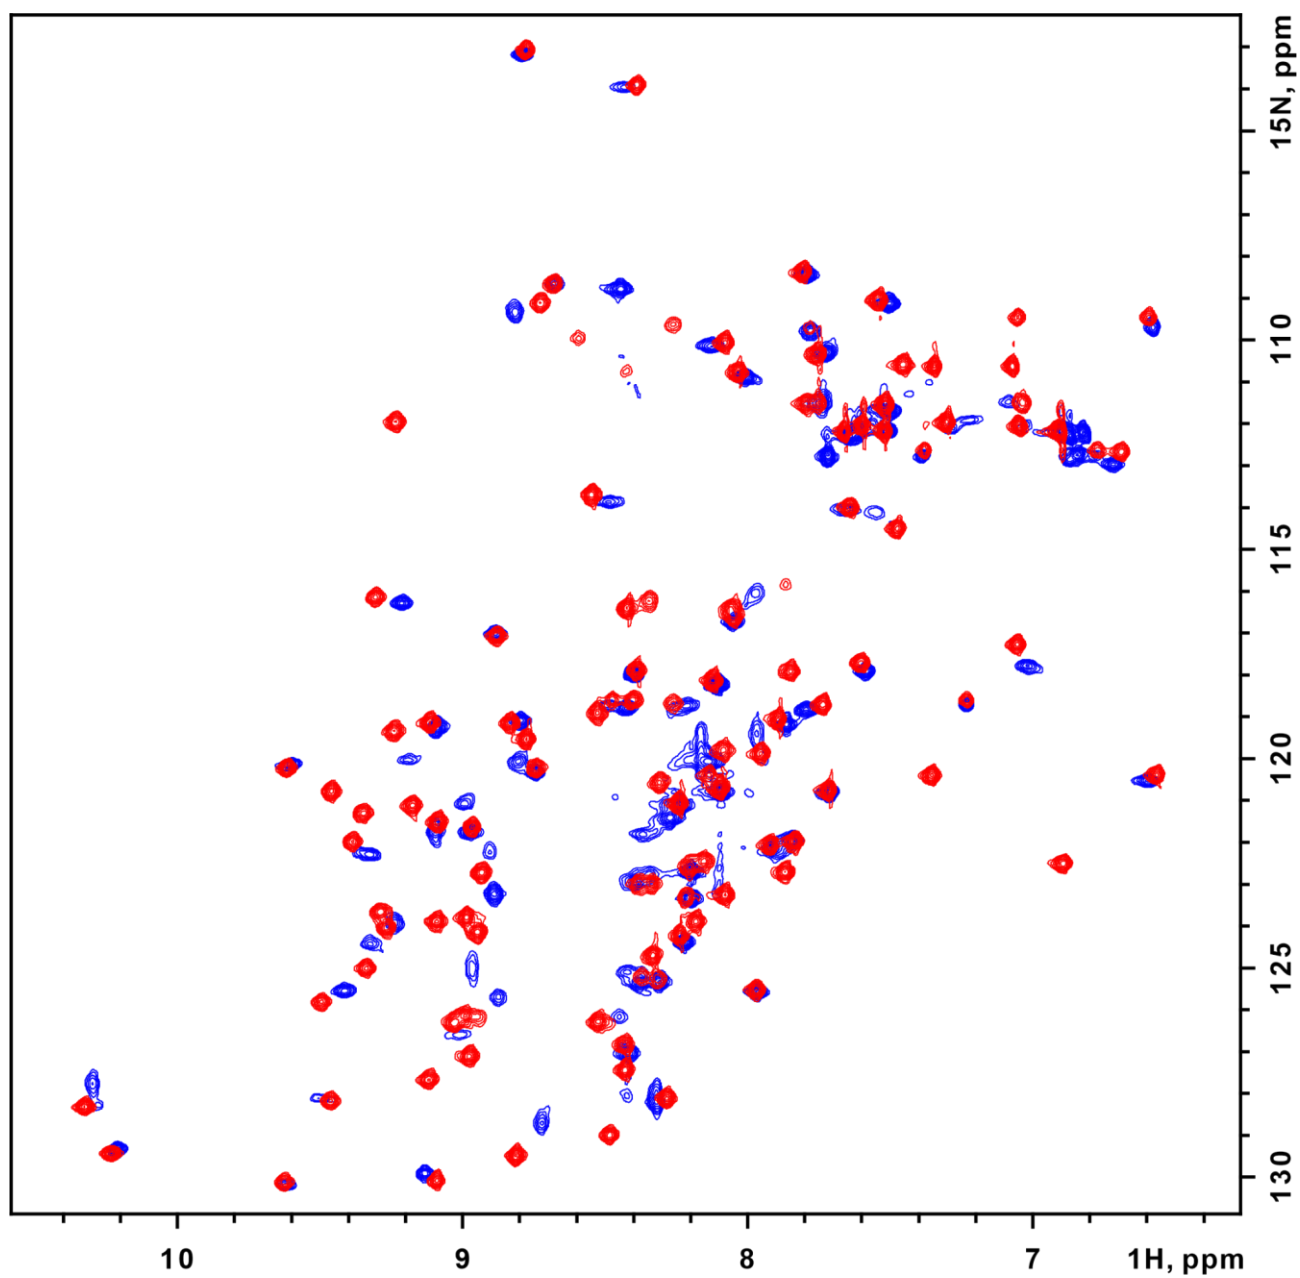

**Figure S4.** <sup>15</sup>N-HSQC spectra of nanoFAST (red) and FAST (blue) apo state. Spectra were obtained at 30 °C, pH 7.0.

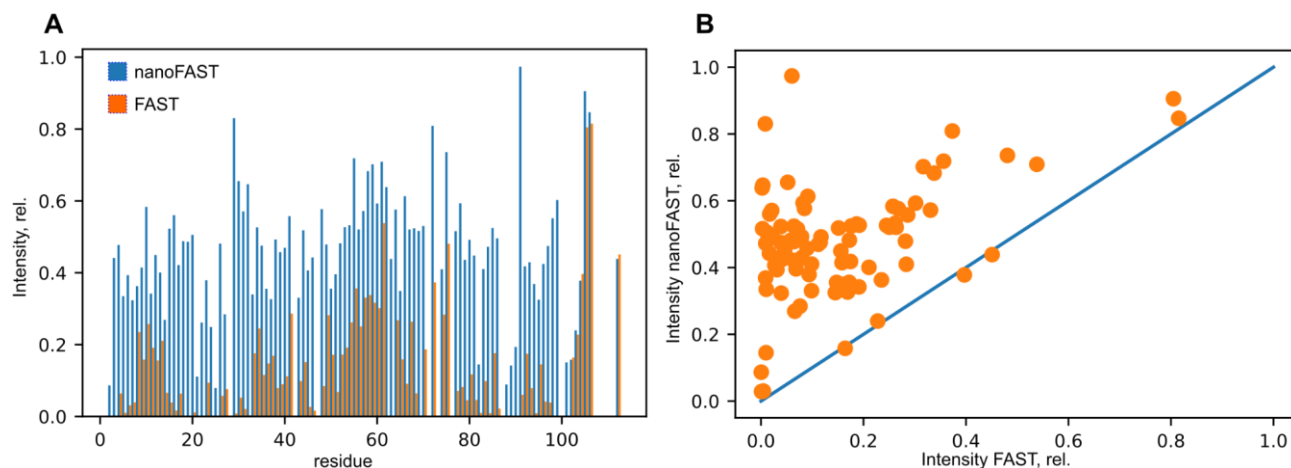

**Figure S5.** *Intensities of NMR signals in the spectra of nanoFAST and FAST.* **A** - intensities of backbone amide cross-peaks in  $^1\text{H}, ^{15}\text{N}$ -HSQC spectra of FAST (shown in orange) and nanoFAST (shown in blue). Spectra were acquired at 30°C, intensities are normalized according to the protein concentrations. **B** - correlation plot of the cross-peak intensities shown in panel **A**. Blue solid line represent the  $y=x$  dependence.

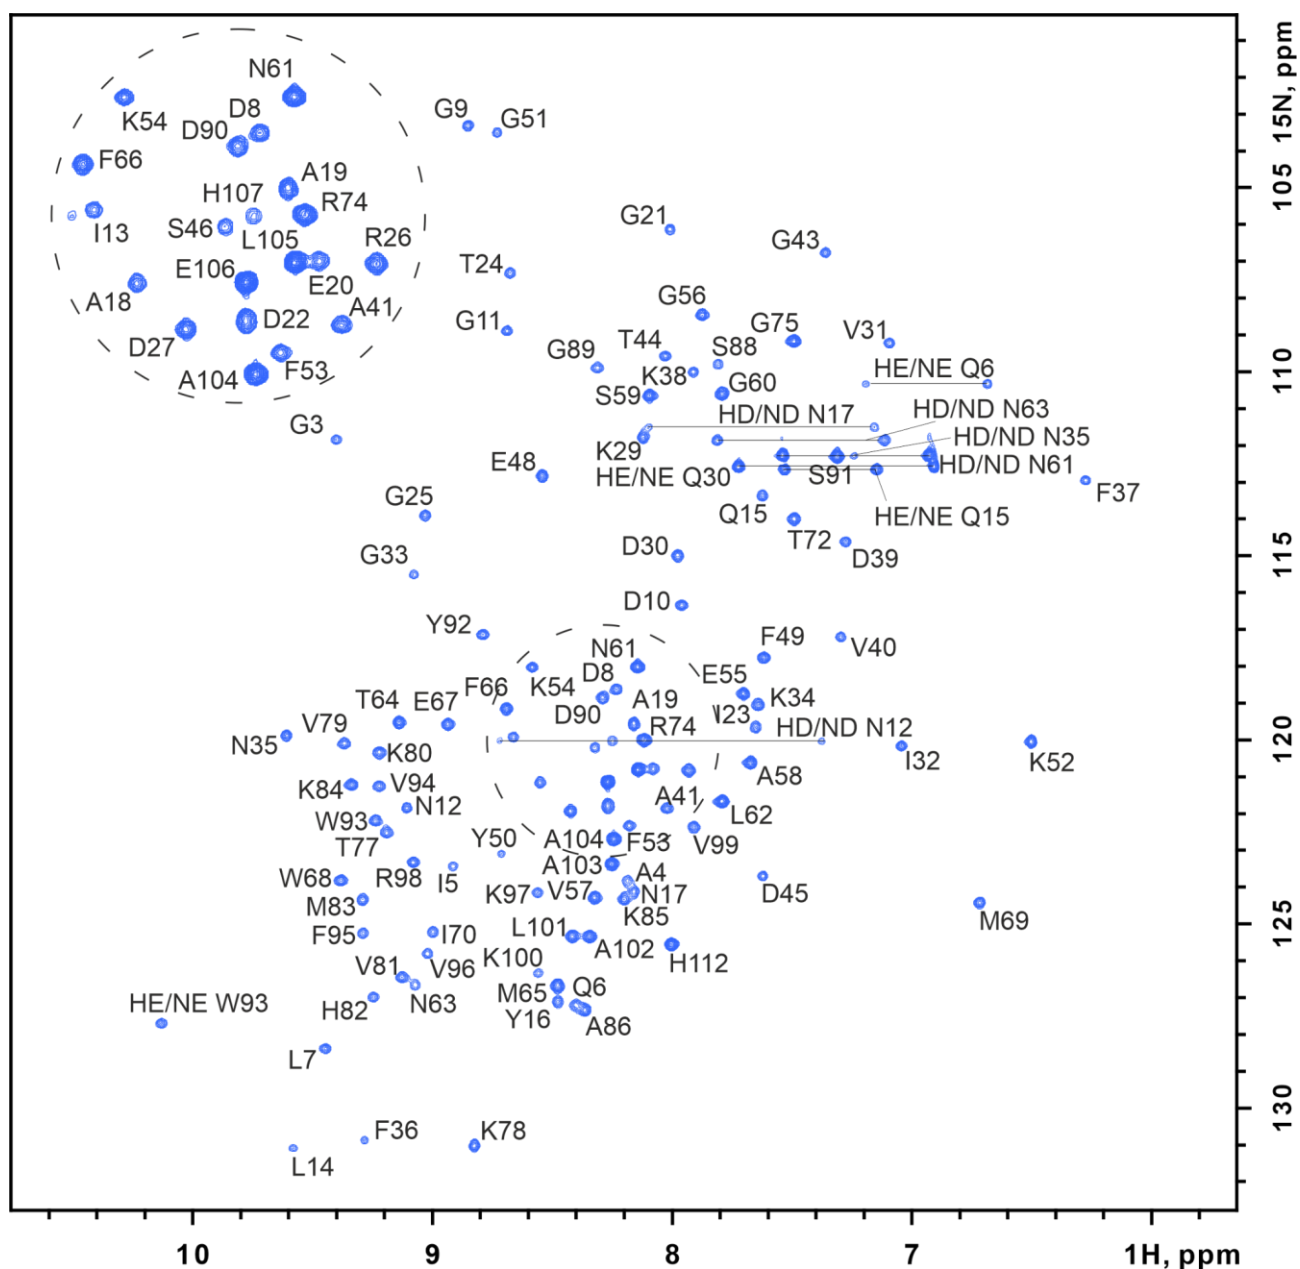

**Figure S6.** 15N-HSQC spectrum of nanoFAST/HBR-DOM2 complex. Spectrum was obtained at 25 °C, pH 7.0. Assignment of NH groups is indicated.

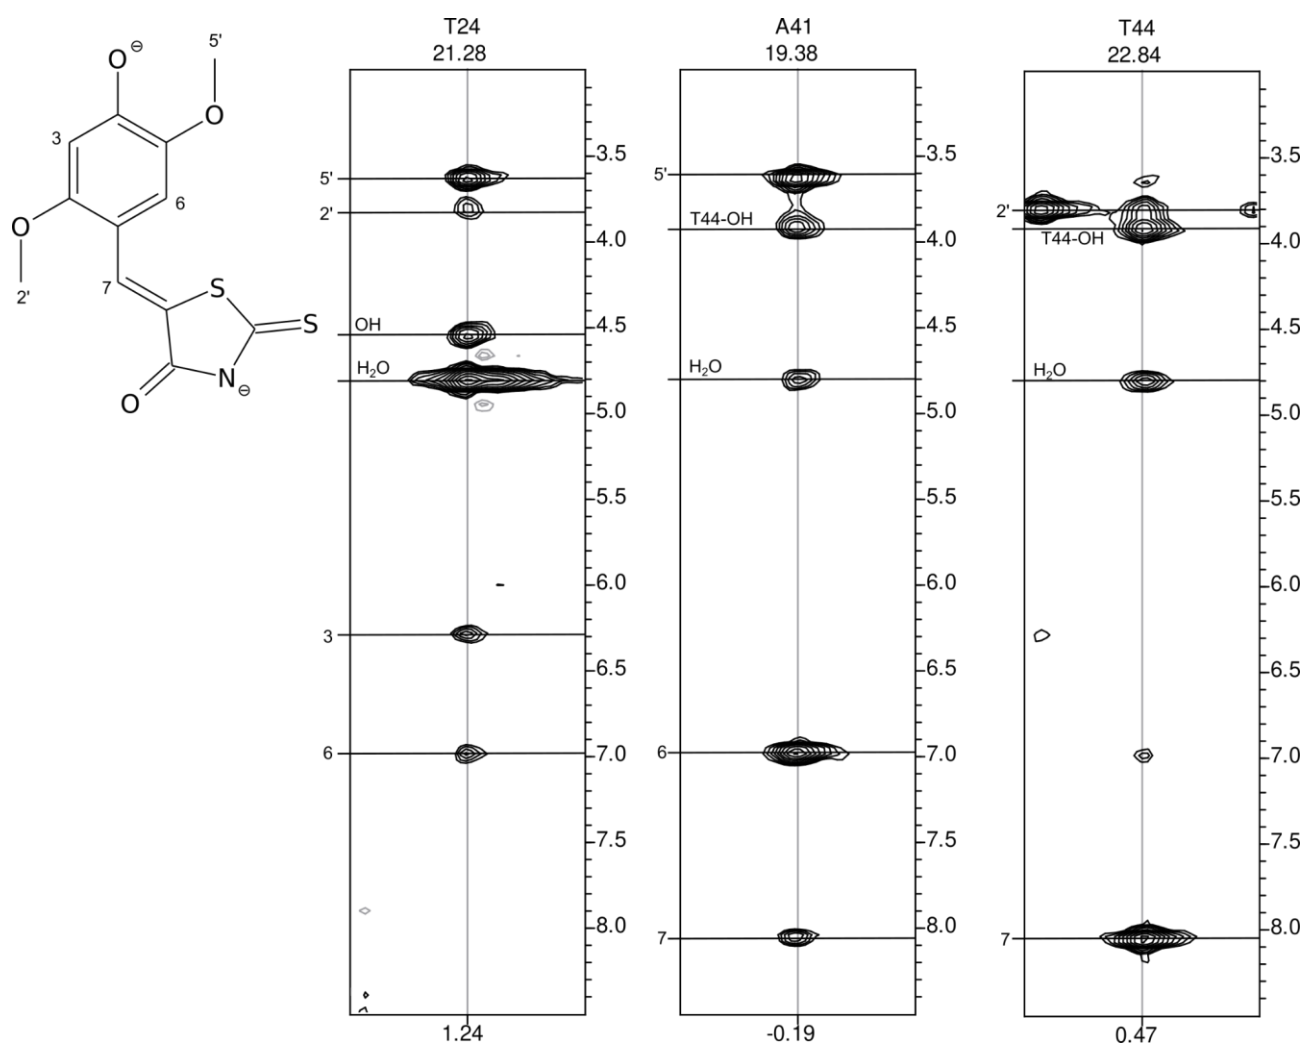

**Figure S7.** *Ligand-protein interactions in nanoFAST/HBR-DOM2 complex.* Shown are the 2D <sup>1</sup>H/<sup>1</sup>H strips from the 3D <sup>13</sup>C/<sup>15</sup>N-filtered, <sup>13</sup>C-edited-NOESY-HSQC. Strips correspond to the signals of the T24, A41 and T44 methyl groups, <sup>13</sup>C and <sup>1</sup>H chemical shifts of the strip anchors are provided at top and at the bottom of the strip, respectively. Assignments of cross-peaks is provided. Structure of HBR-DOM2 with the indicated atom numbering is shown at left.

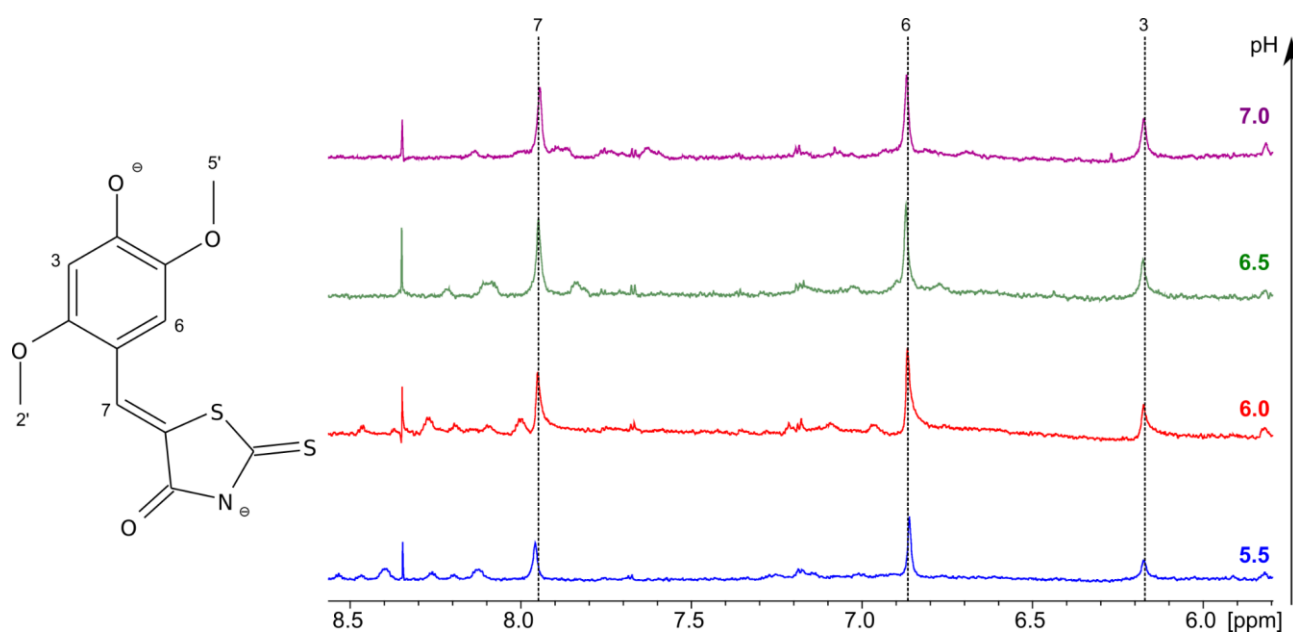

**Figure S8.** *pH-dependence of HBR-DOM2 NMR spectra.* 1D  $^{13}\text{C}$ ,  $^{15}\text{N}$ -filtered NOESY spectra of nanoFAST/HBR-DOM2 complex obtained at various pH in the range 5.5-7.0. Positions of peaks originating from the HBR-DOM2 protons are shown by dashed lines and denoted by atom numbers.



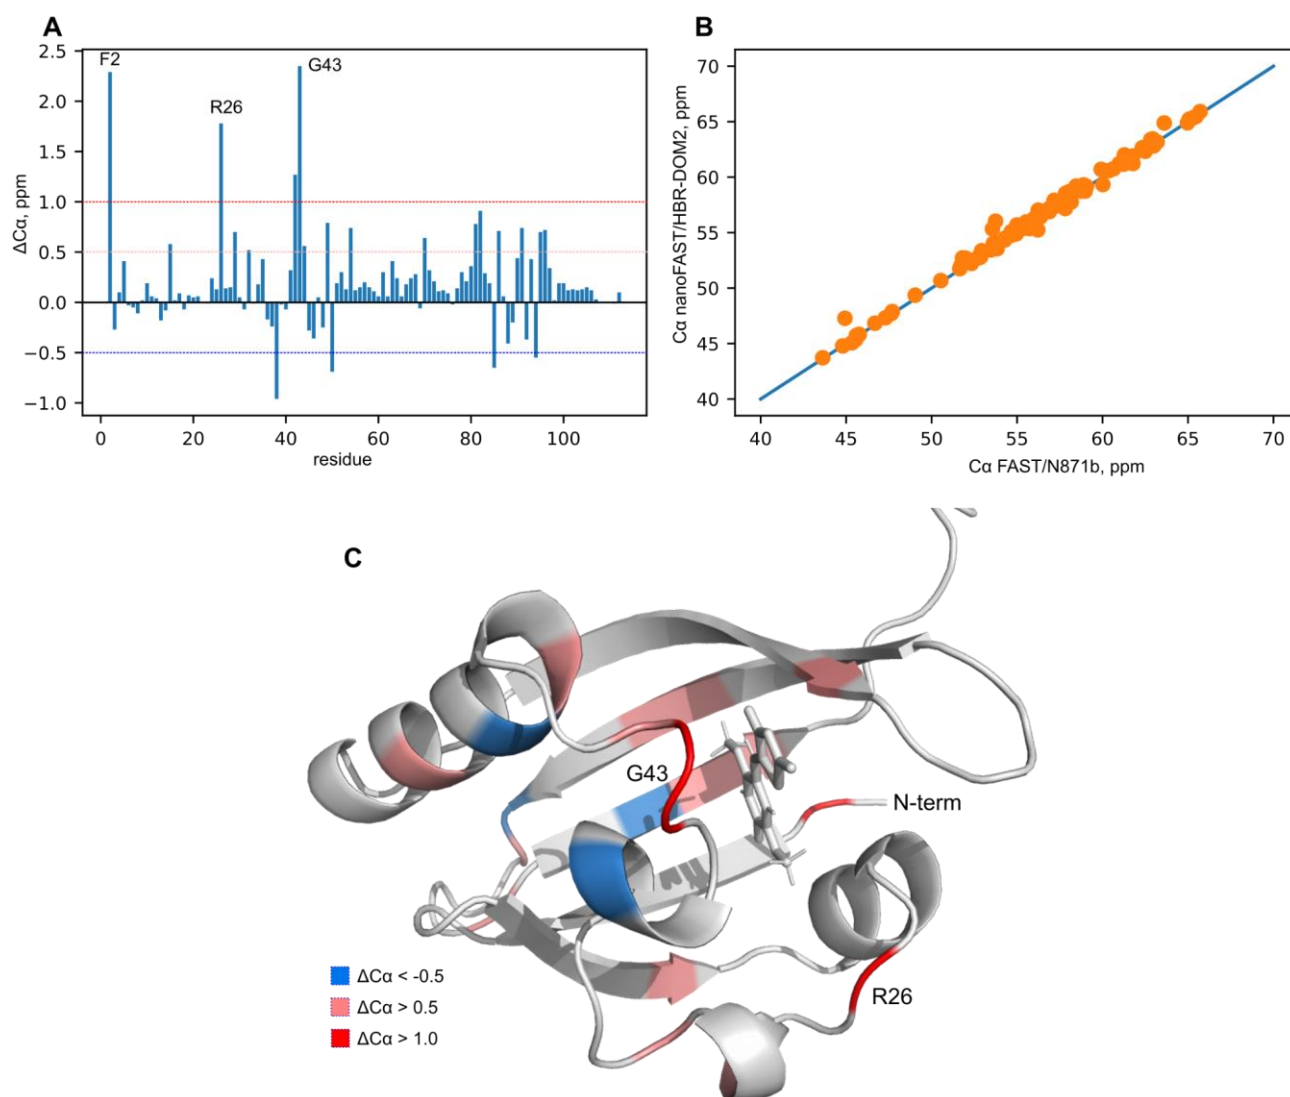

**Figure S9.** Chemical shift analysis, nanoFAST/HBR-DOM2 vs FAST/N871b. **A** -  $^{13}\text{C}\alpha$  chemical shift differences, observed between the residues of nanoFAST and of FAST C-terminal domain in their complexes with HBR-DOM2 and N871b, respectively (nanoFAST-FAST). Dashed lines denote the thresholds used for the painting in panel **C**. **B** - the correlation plot between the  $^{13}\text{C}\alpha$  chemical shifts of nanoFAST and corresponding residues of FAST C-terminal domain in complexes with fluorogens. Blue lines show the  $y=x$  dependence. **C** - spatial structure of nanoFAST/HBR-DOM2 complex is painted according to the chemical shift differences shown in panel **A**.

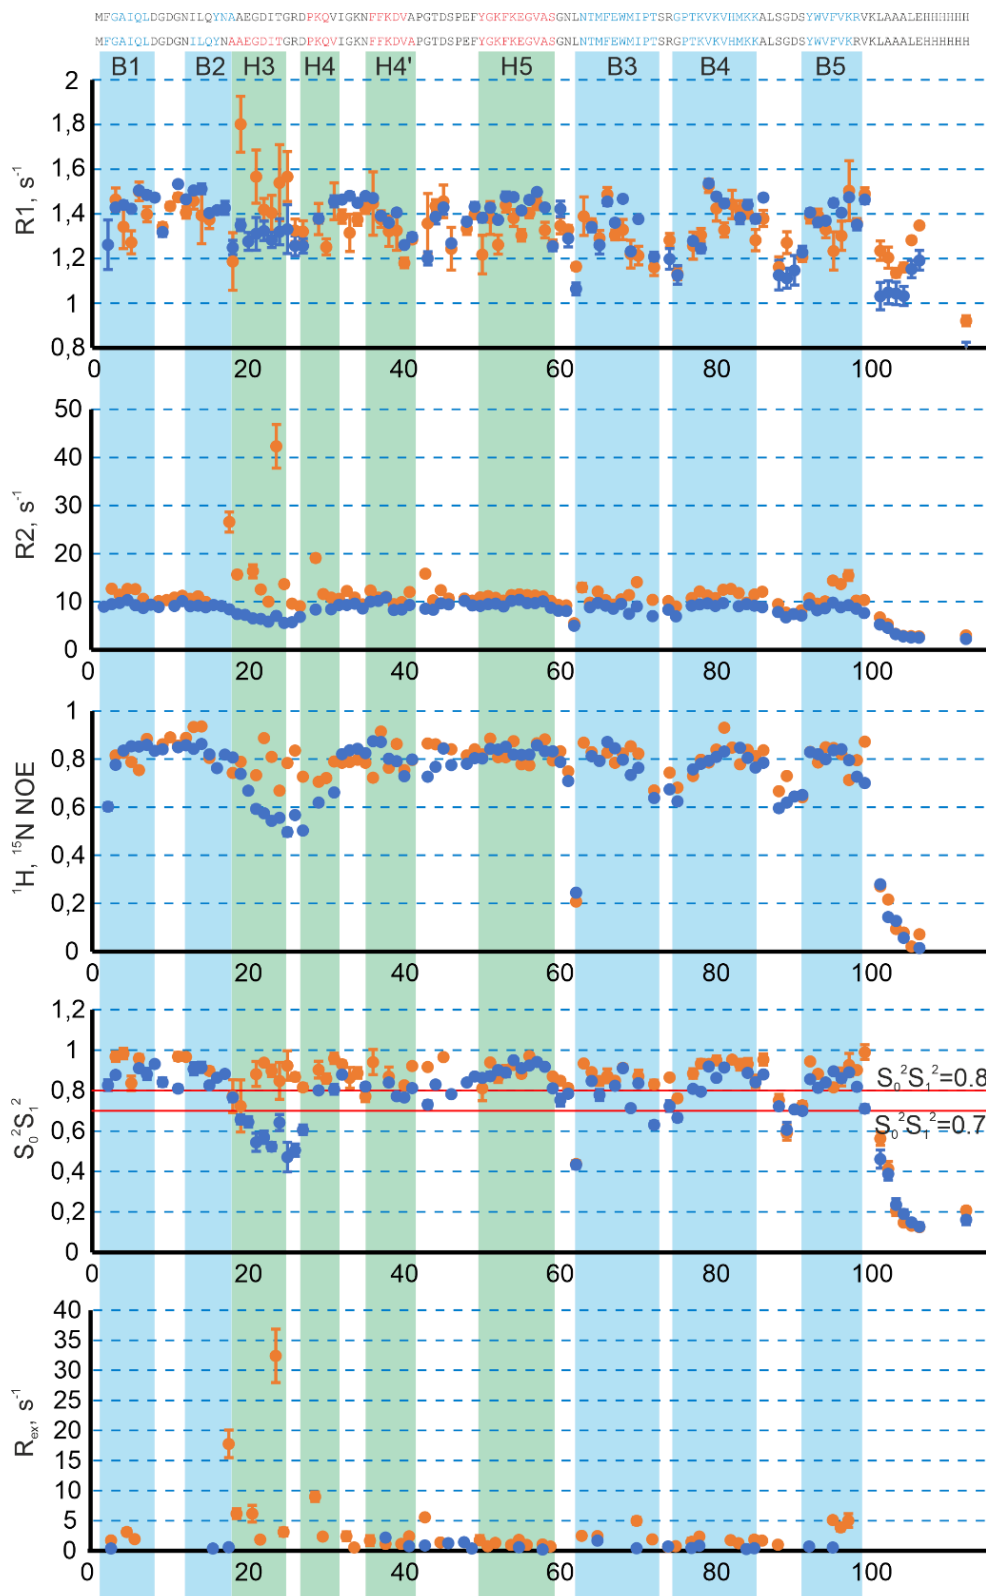

**Figure S10.** Dynamics of nanoFAST. NMR relaxation parameters of  $^{15}\text{N}$  nuclei (rates of longitudinal (R1) and transverse (R2) relaxation, heteronuclear equilibrium NOE ( $^1\text{H}, ^{15}\text{N}$  NOE)) and internal mobility parameters - generalized order parameter  $S_0^2 S_1^2$  and exchange contribution to the transverse relaxation  $R_{\text{ex}}$ , measured for nanoFAST in apo state (blue color) and complex of nanoFAST/HBR-DOM2 (orange color).

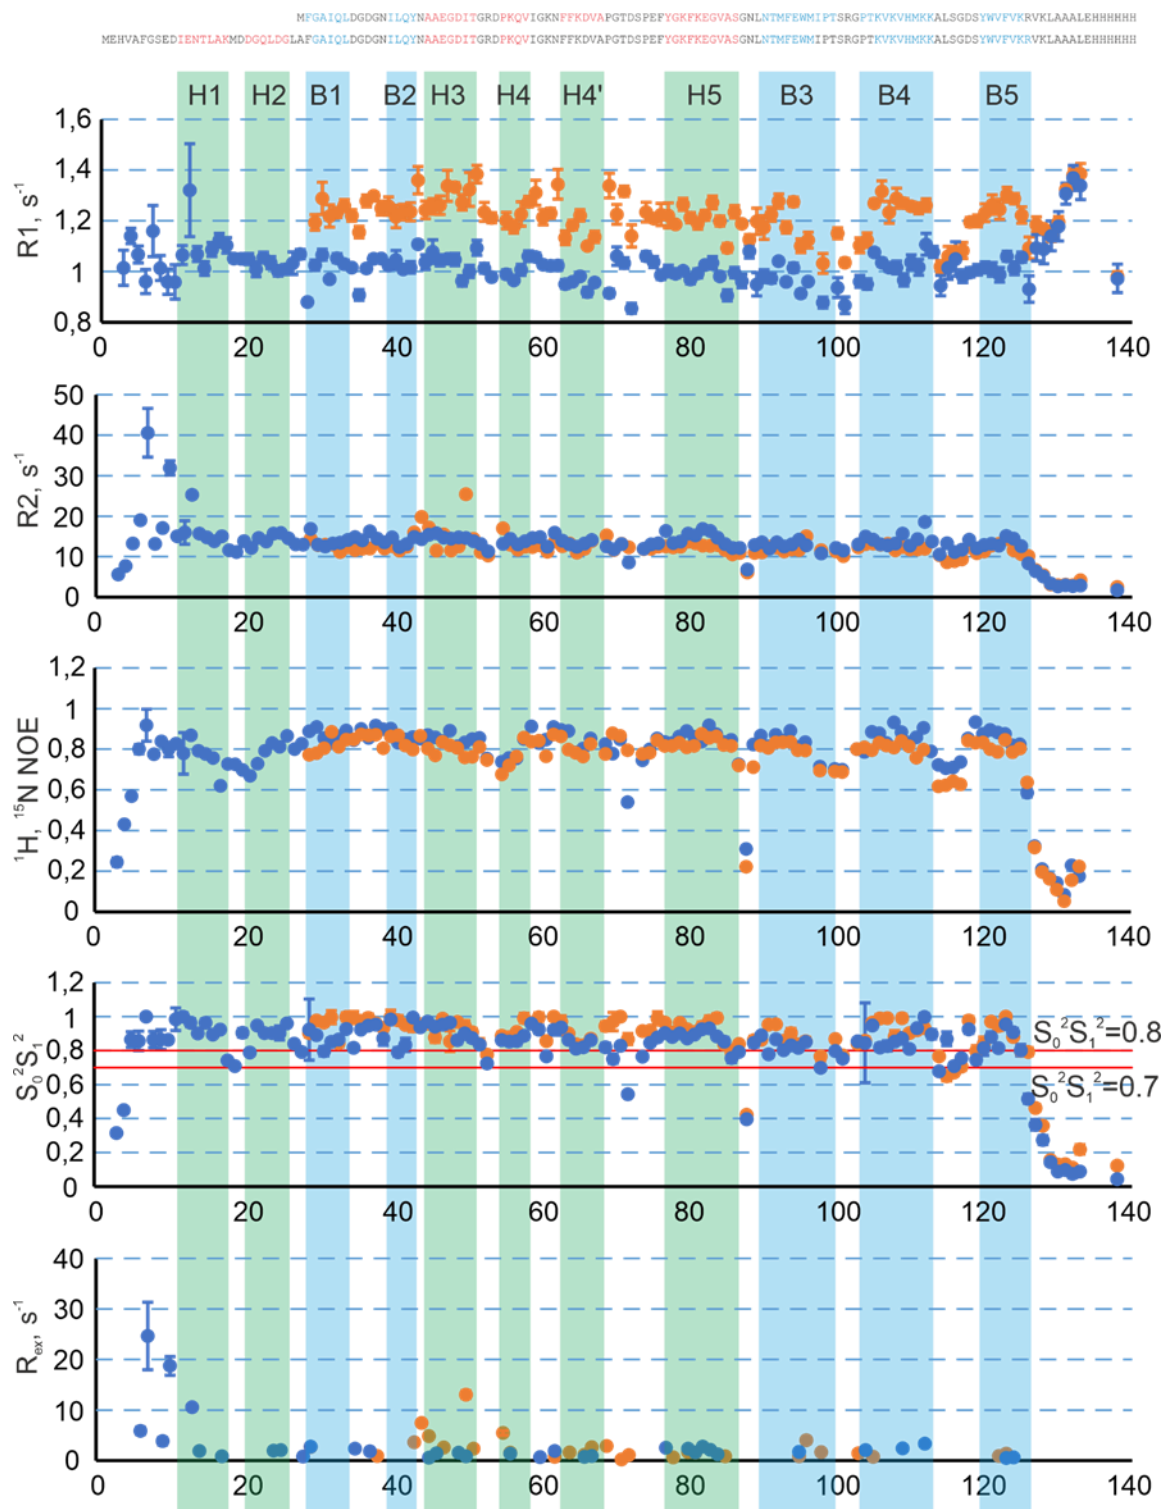

**Figure S11.** Comparison of nanoFAST and FAST dynamics. NMR relaxation parameters of  $^{15}\text{N}$  nuclei (rates of longitudinal ( $R_1$ ) and transverse ( $R_2$ ) relaxation, heteronuclear equilibrium NOE ( $^1\text{H}, ^{15}\text{N}$  NOE)) and internal mobility parameters - generalized order parameter  $S_0^2 S_1^2$  and exchange contribution to the transverse relaxation  $R_{\text{ex}}$ , measured for nanoFAST/HBR-DOM2 (orange color) and FAST/N871b (blue color) complexes. Numeration in nanoFAST is shifted by 27 residues.

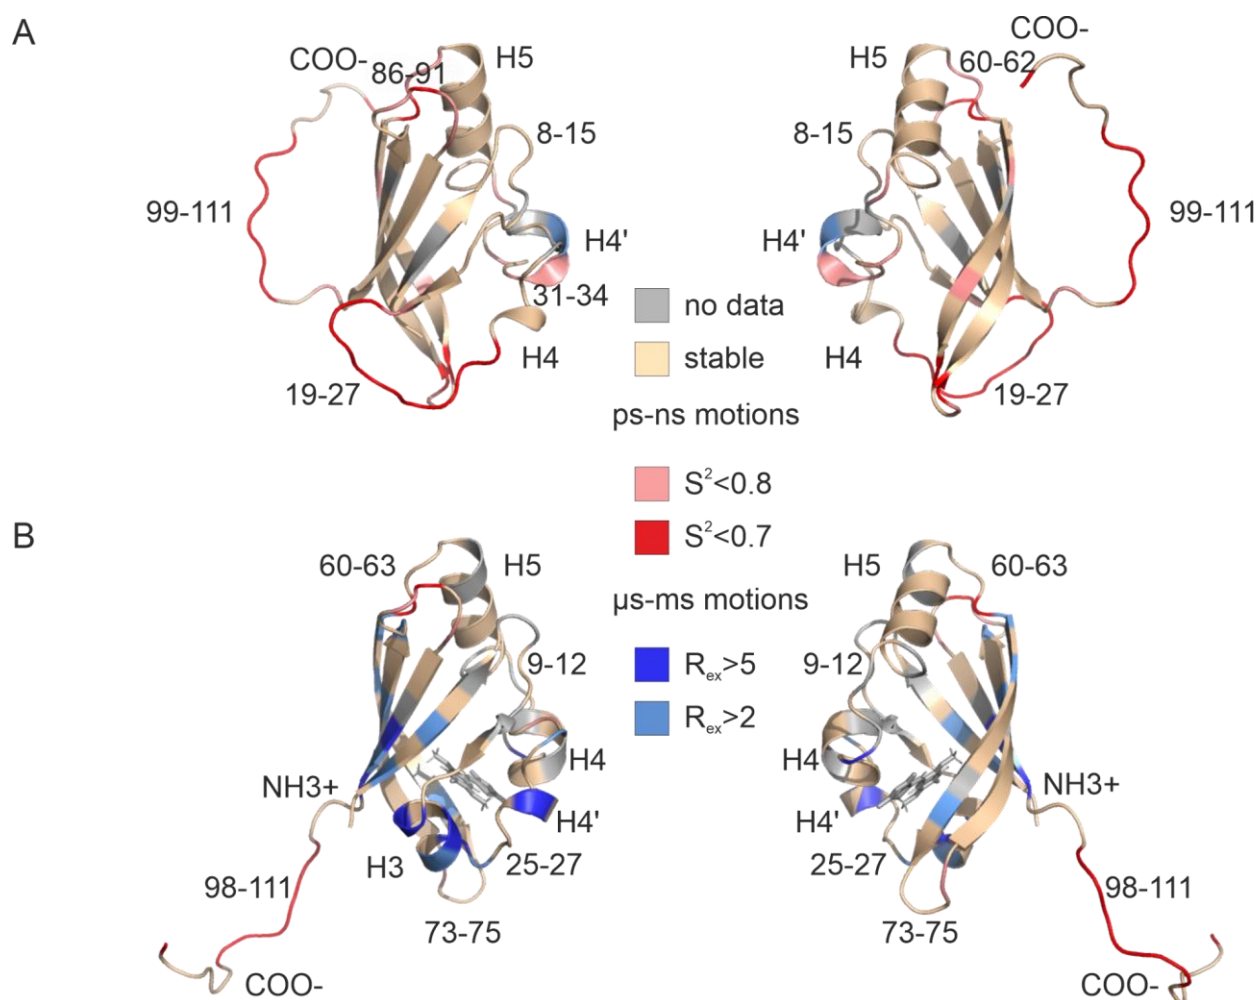

**Figure S12. Motions of the protein backbone.** **A** - motions of the backbone of nanoFAST in apo state. **B** - motions of the backbone of nanoFAST in complex with HBR-DOM2. Color codes are provided in the legends.

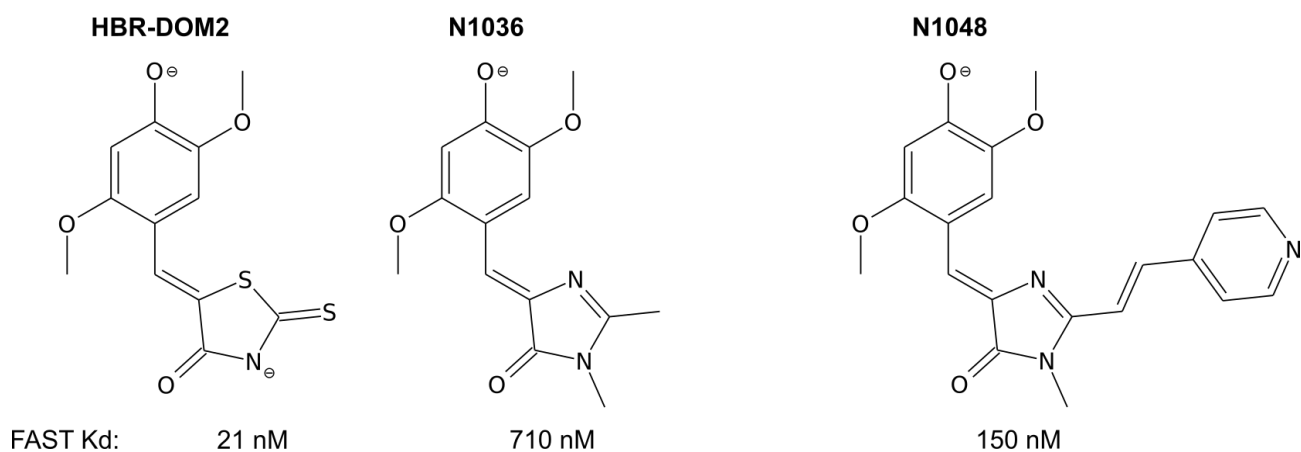

**Figure S13** Structures and [FAST-fluorogen] dissociation constants of HBR and HBI ligands with the same substituents of 4-hydroxybenzylidene group. Kds are provided according to the work [11] (HBR-DOM2) and according to the current work (N 1036 and N 1048).

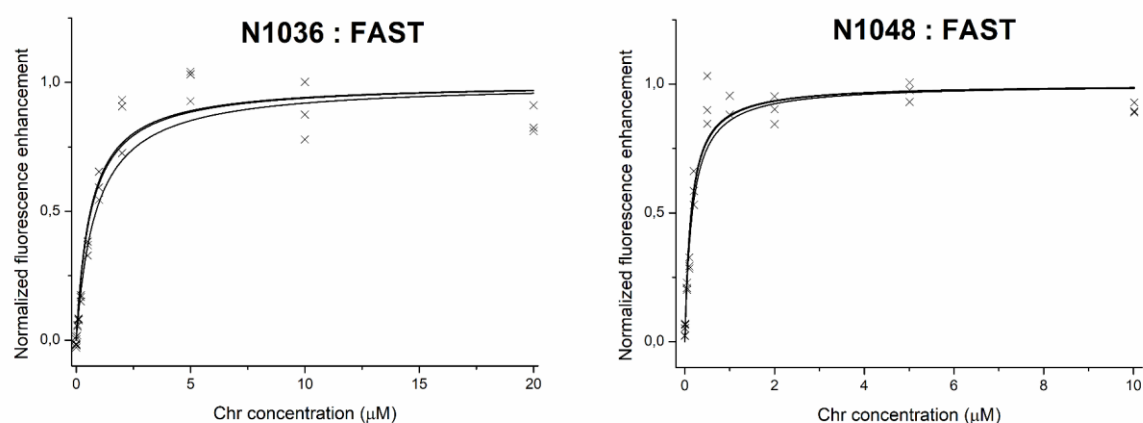

**Figure S14.** Titration curves observed for **N 1036** and **N 1048** complexes with FAST.

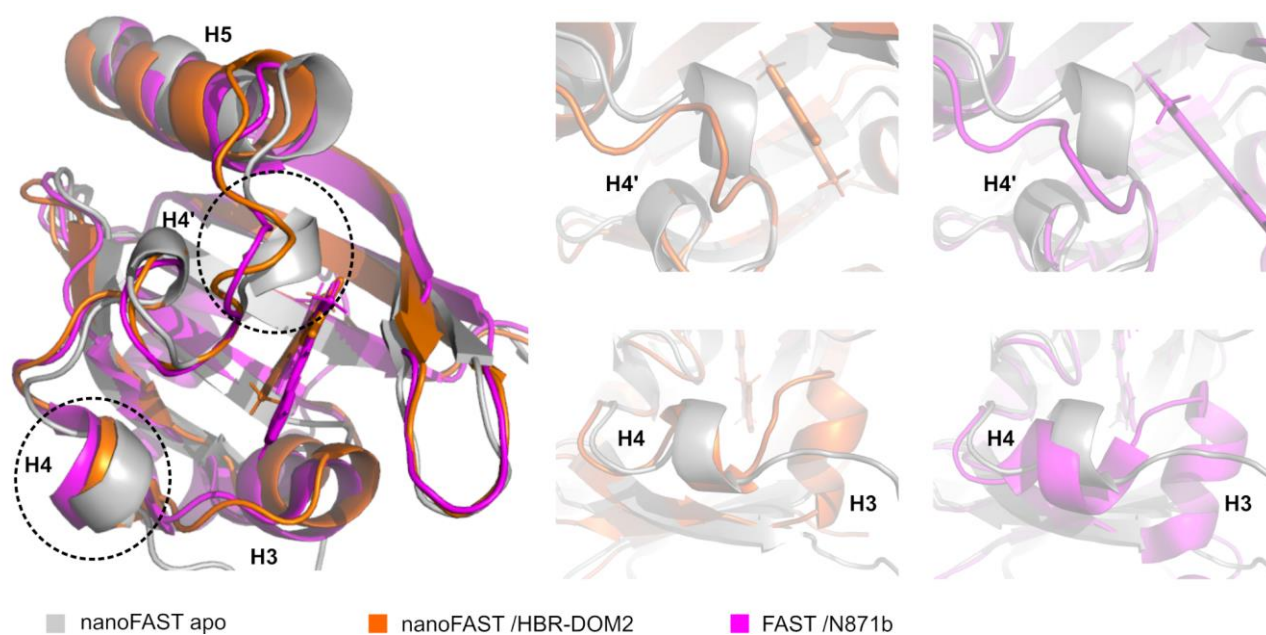

**Figure S15.** Ligand-induced changes in the nanoFAST structure. Shown are the spatial structures of nanoFAST apo state (gray), nanoFAST/HBR-DOM2 (orange), FAST/N871b (magenta). Structures are superimposed using the backbone atoms of the  $\beta$ -sheet residues. Zoomed views on the regions, shown by black circles are provided in right panels.

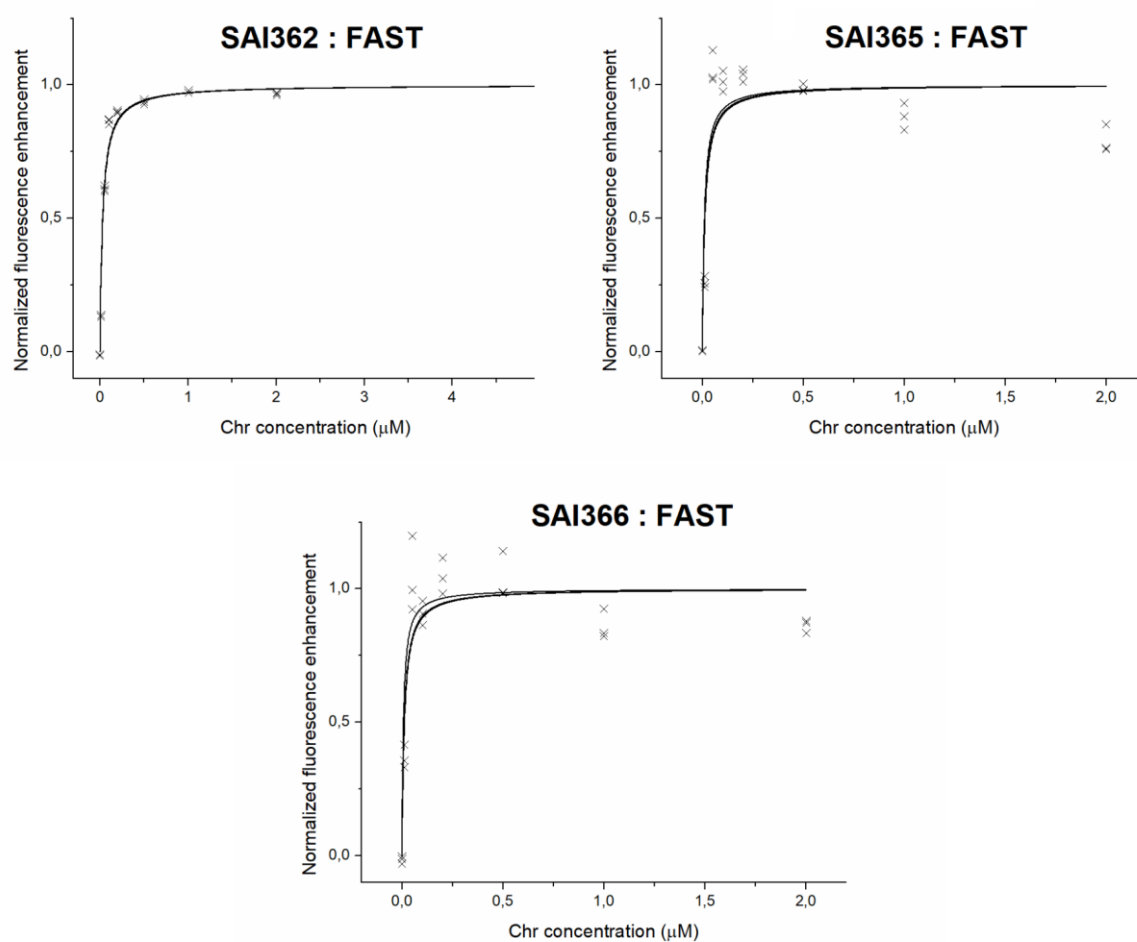

**Figure S16.** Titration curves observed for **SAI 362**, **SAI 365** and **SAI 366** complexes with FAST. Lines indicate the result of approximation.

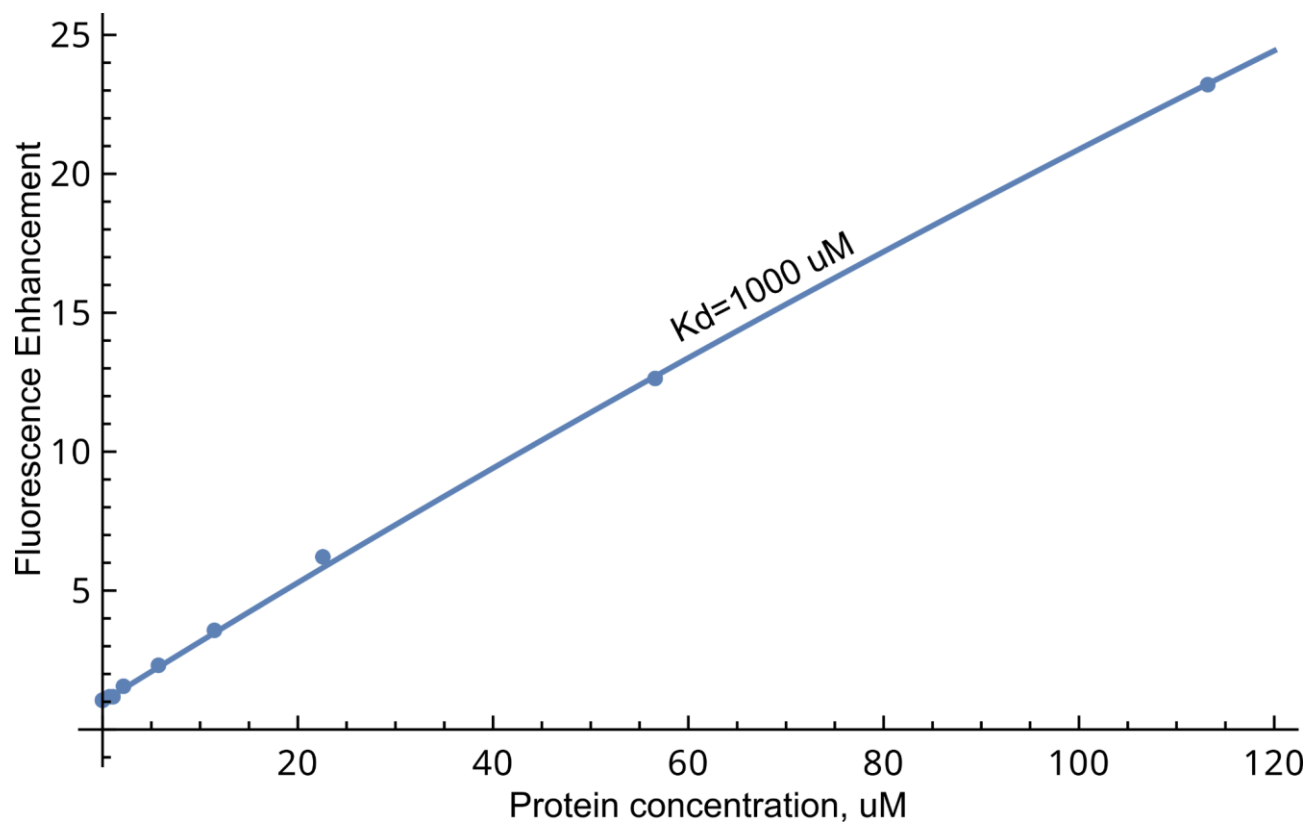

**Figure S17.** Titration curve, observed for the N871b complex with nanoFAST. Line denotes the result of the data approximation assuming the  $K_d$  equal to 1 mM.

**Table S1.** Dissociation constants values of complexes [FAST-chromophore]

| Chromophore | Structure                                                                           | $K_D, \mu\text{M}$ |
|-------------|-------------------------------------------------------------------------------------|--------------------|
| SAI 362     | 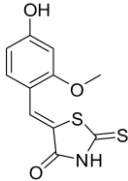   | $0.031 \pm 0.001$  |
| SAI 365     |    | $0.012 \pm 0.001$  |
| SAI 366     |    | $0.010 \pm 0.003$  |
| N 1036      |   | $0.71 \pm 0.14$    |
| N1048       |  | $0.15 \pm 0.01$    |
